# Supplementary material for: Highly Efficient Synthetic CRISPR RNA/Cas9-Based Mutagenesis for Rapid Cardiovascular Phenotypic Screening in F0 Zebrafish
Source: PubMed Central journal article supplement (PMC8570140; doi:10.3389/fcell.2021.735598), 2021-10-22

# Supplementary Figure 1

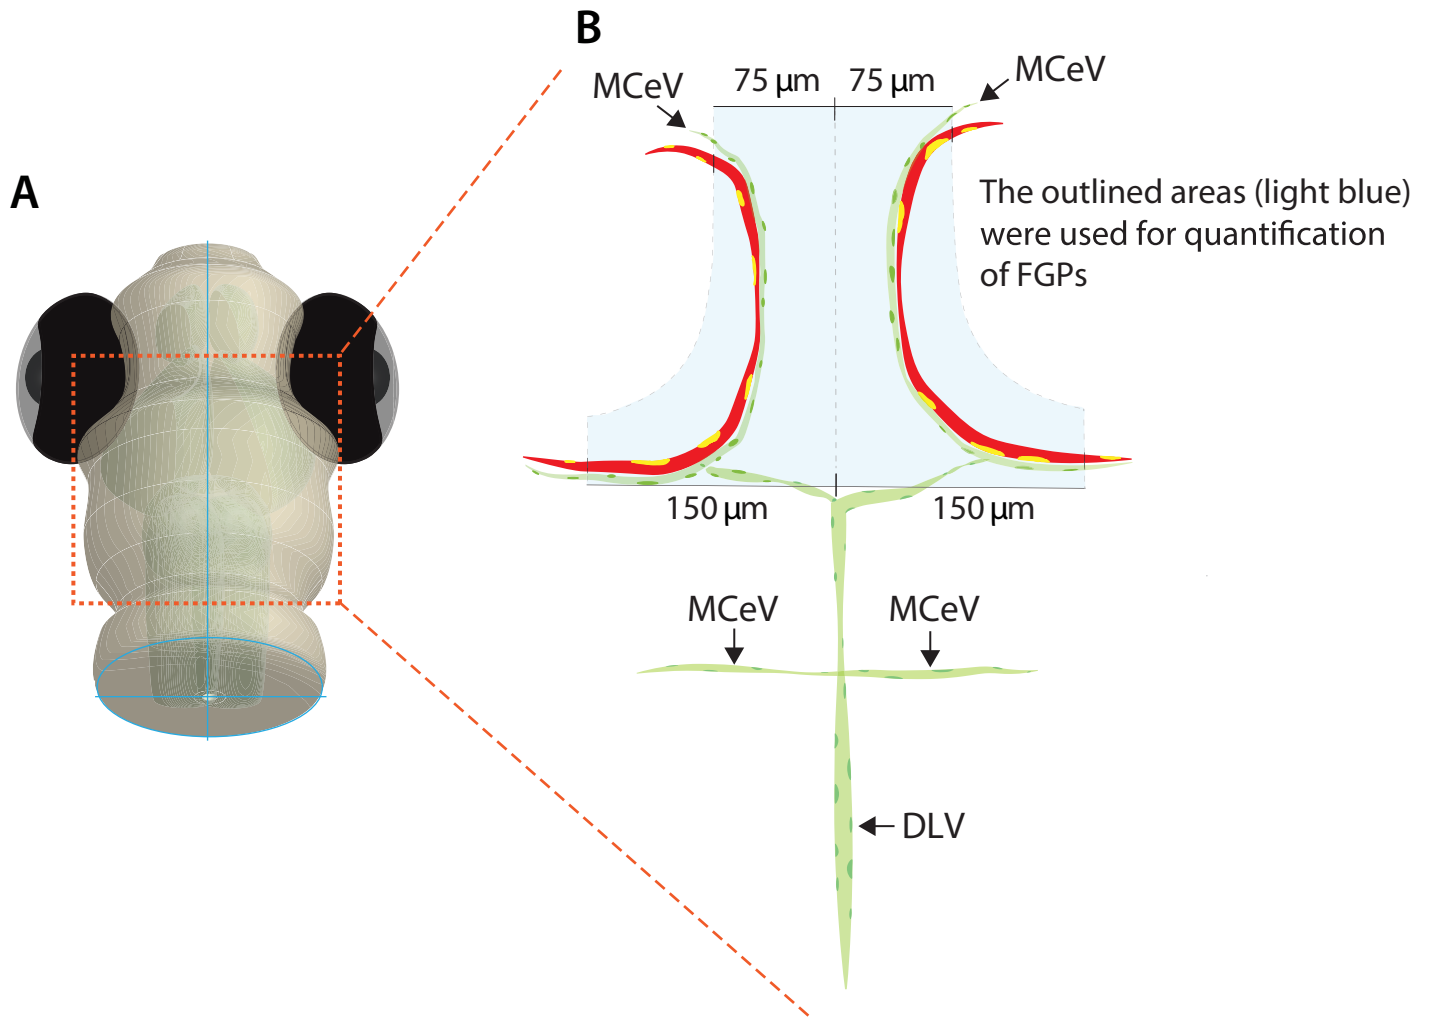

# Supplementary Figure 2

**A**

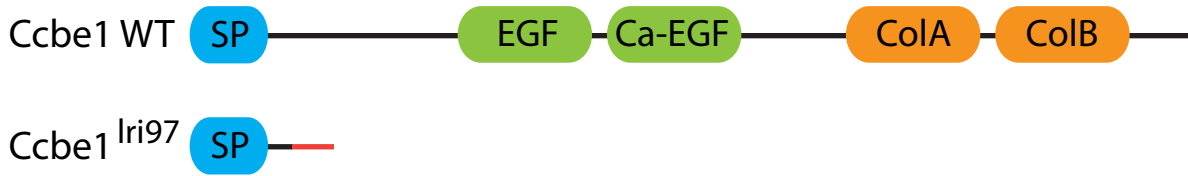

**B**

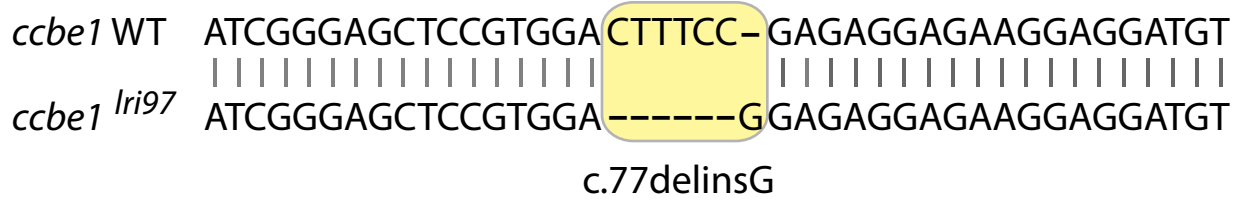

**C**

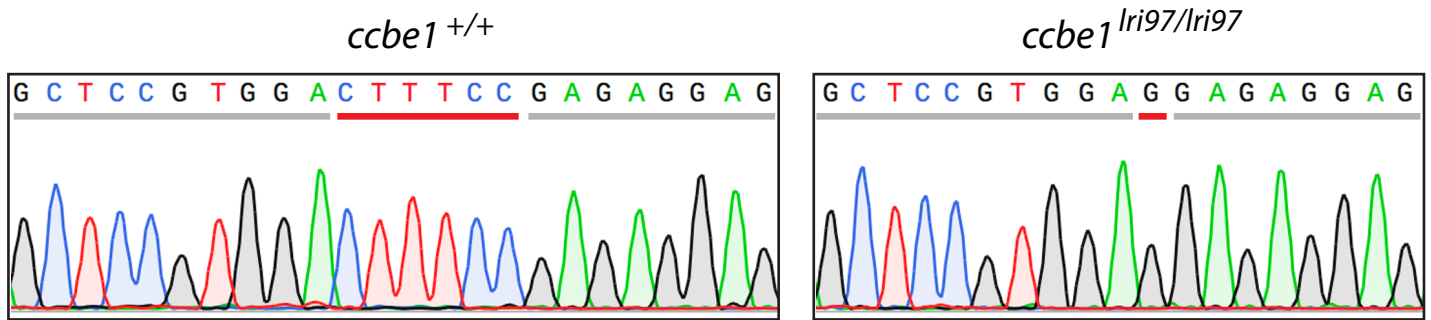

**D**

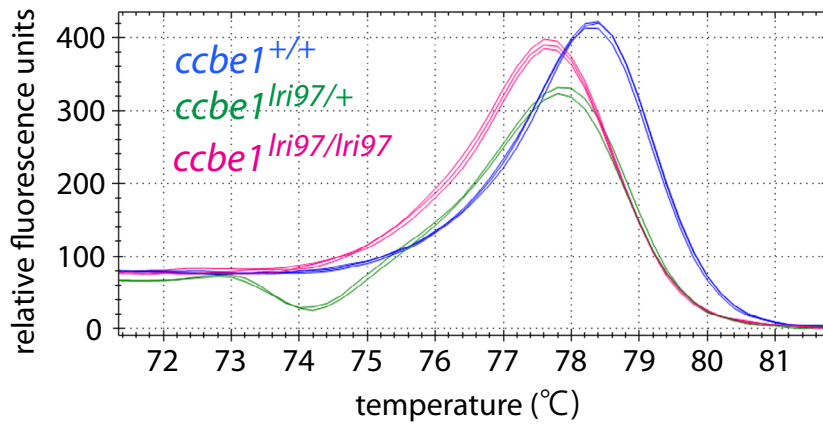

# Supplementary Figure 3

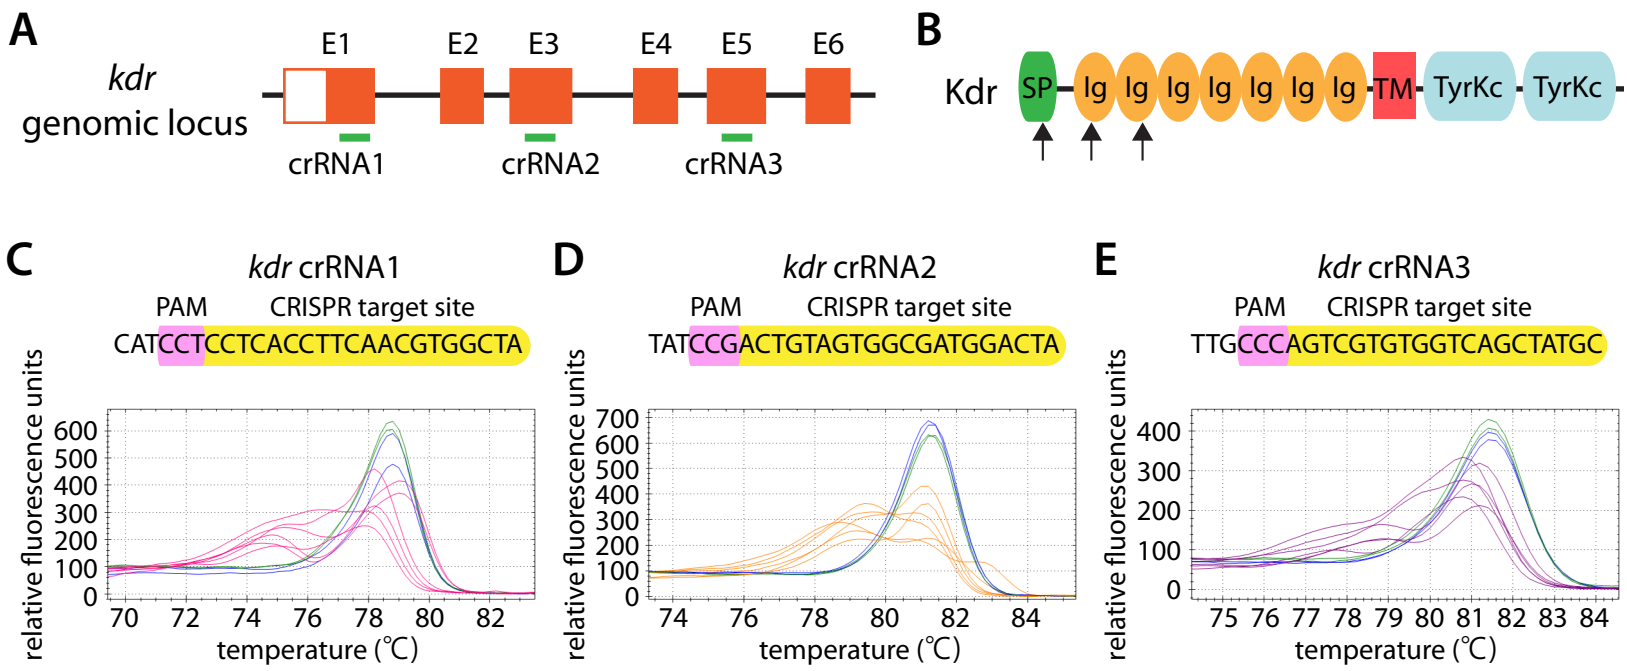

# Supplementary Figure 4

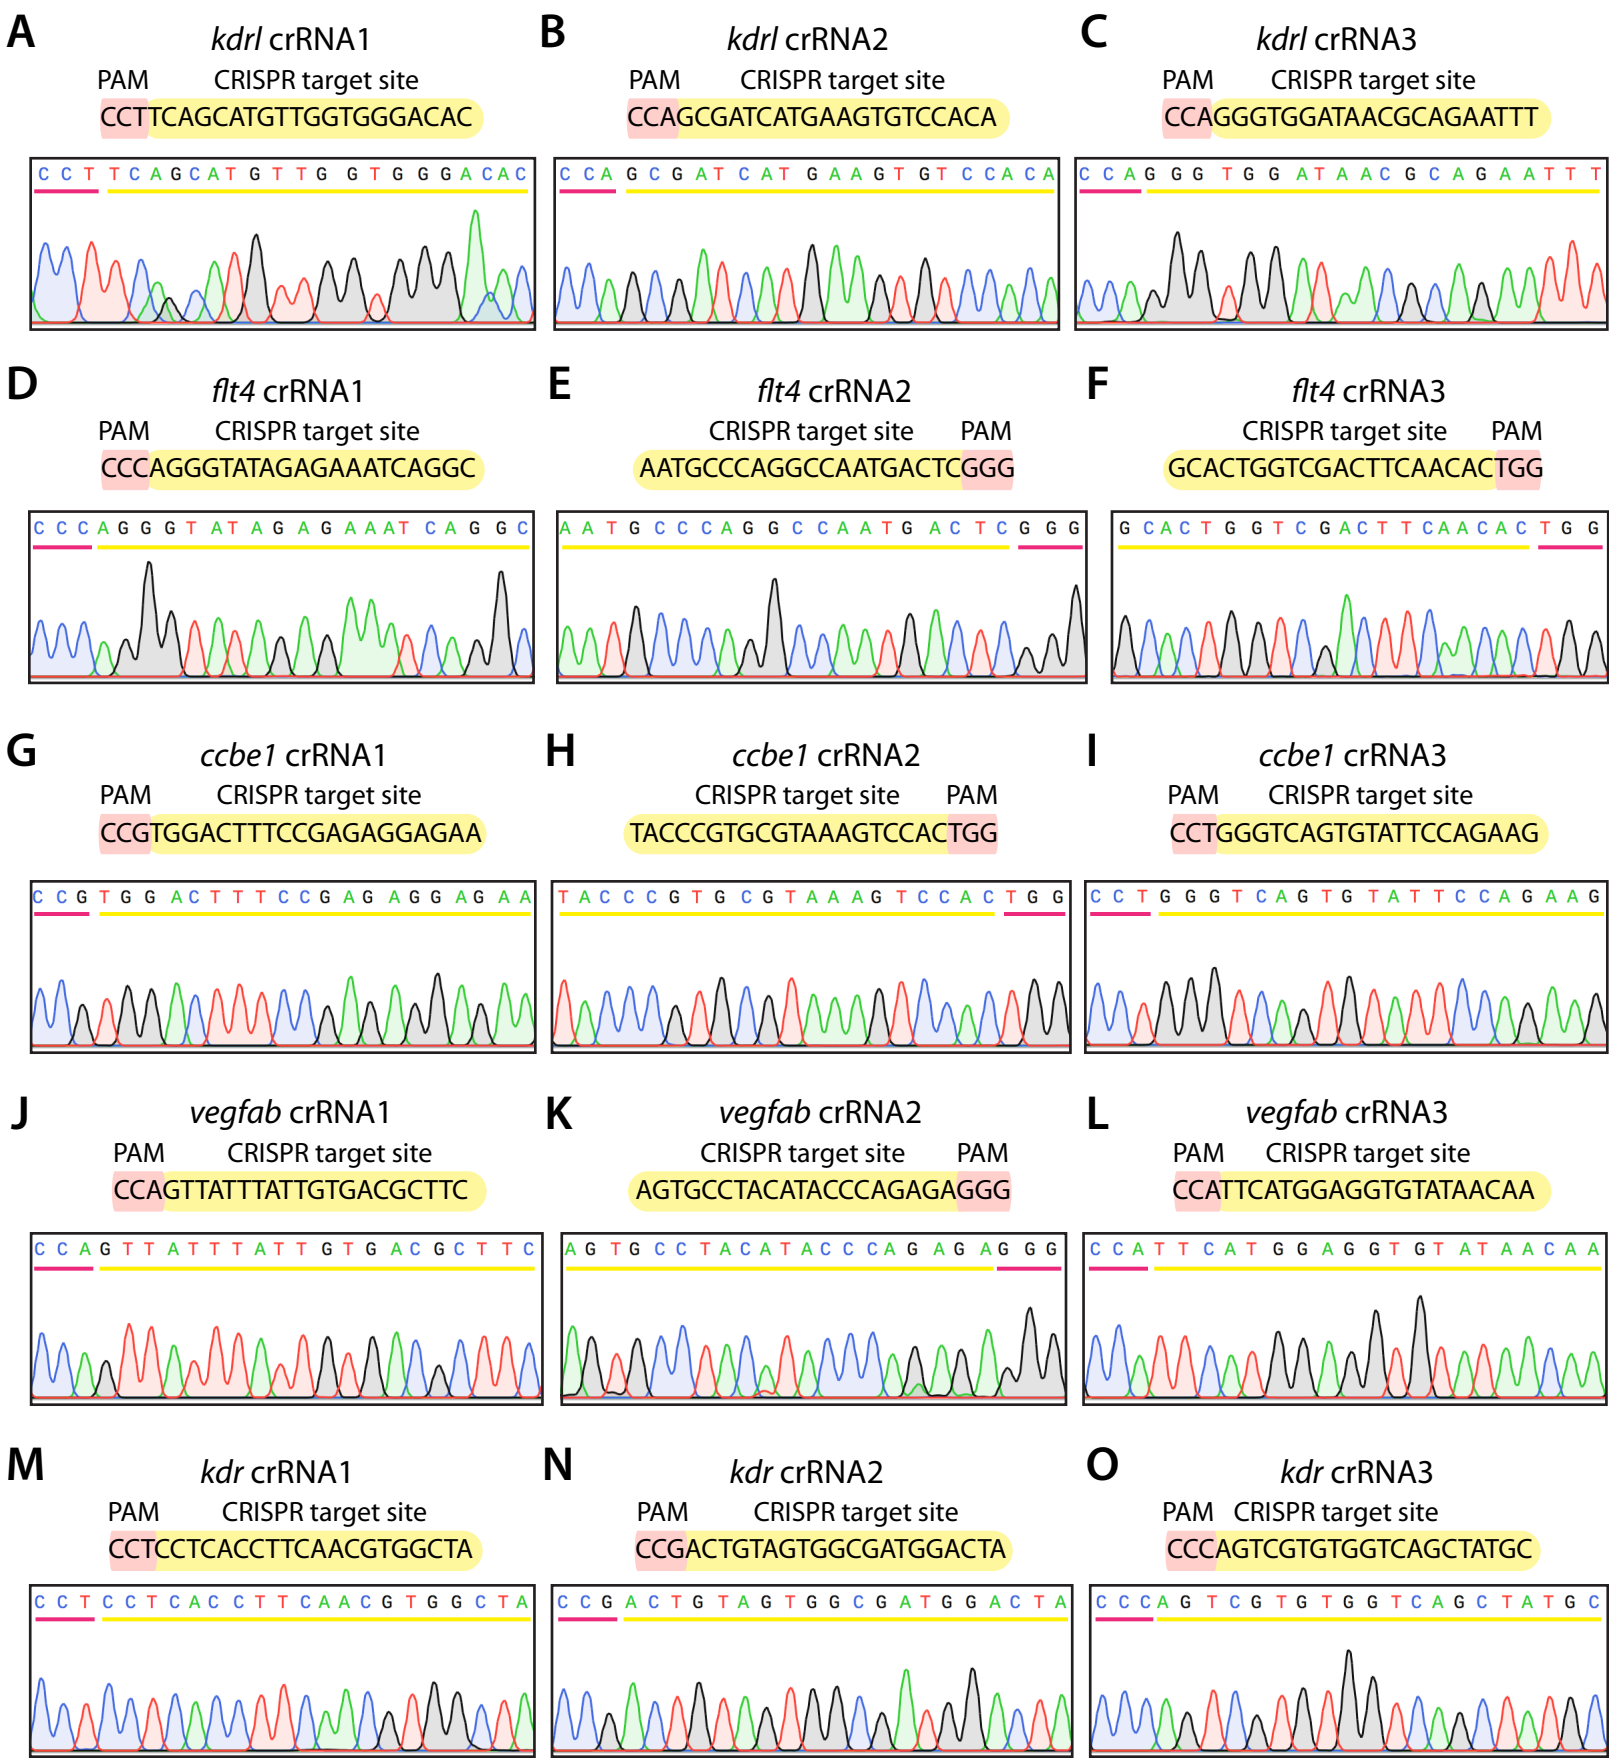

Supplement: Image_1.pdf [file Image_1.pdf]
